# Supplementary material for: Cost-Effectiveness of Intensified Versus Conventional Multifactorial Intervention in Type 2 Diabetes
Source: Oxford University Press journal article supplement (doi:10.2337/dc07-2452), 2008-06-07
Supplement: dc072452-sup-supps.doc [file dc072452-sup-supps.doc]

**Appendix 1** Transition probabilities from Steno-2: intensive treatment arm

| **Year** | **1** | **2** | **3** | **4** | **5** | **6** | **7** | **8** | **9+** |
| --- | --- | --- | --- | --- | --- | --- | --- | --- | --- |
| Death | 0.00000 | 0.02500 | 0.01282 | 0.01299 | 0.01316 | 0.02685 | 0.04148 | 0.02878 | 0.02013 |
| MI | 0.01250 | 0.01250 | 0.00000 | 0.03896 | 0.00000 | 0.00000 | 0.00000 | 0.00000 | 0.00800 |
| CABG | 0.00000 | 0.01250 | 0.01282 | 0.00000 | 0.01316 | 0.00000 | 0.01408 | 0.01429 | 0.00836 |
| PCI | 0.00000 | 0.00000 | 0.00000 | 0.00000 | 0.00000 | 0.00000 | 0.00000 | 0.00000 | 0.00000 |
| Stroke (major) | 0.01250 | 0.01250 | 0.00000 | 0.00000 | 0.01316 | 0.00000 | 0.00000 | 0.00000 | 0.00477 |
| Stroke (minor) | 0.00000 | 0.00000 | 0.00000 | 0.00000 | 0.00000 | 0.00000 | 0.00000 | 0.00000 | 0.00000 |
| Toe amp. | 0.00000 | 0.05000 | 0.01282 | 0.00000 | 0.00000 | 0.00000 | 0.00000 | 0.00000 | 0.00785 |
| Major leg amp. | 0.00000 | 0.00000 | 0.02564 | 0.00000 | 0.00000 | 0.00000 | 0.00000 | 0.00000 | 0.00321 |
| Revasc. leg | 0.00000 | 0.01250 | 0.01282 | 0.02597 | 0.00000 | 0.02667 | 0.00000 | 0.00000 | 0.00975 |
| Revasc. carotid artery | 0.00000 | 0.00000 | 0.00000 | 0.00000 | 0.00000 | 0.00000 | 0.00000 | 0.00000 | 0.00000 |
| Hosp. for CHF | 0.00000 | 0.01250 | 0.00000 | 0.00000 | 0.03947 | 0.00000 | 0.00000 | 0.00000 | 0.00650 |
| Dialysis | 0.00000 | 0.00000 | 0.00000 | 0.00000 | 0.00000 | 0.00000 | 0.00000 | 0.00000 | 0.00000 |
| ESRD | 0.00000 | 0.00000 | 0.00000 | 0.00000 | 0.00000 | 0.00000 | 0.00000 | 0.00000 | 0.00000 |

MI = myocardial infarction; CABG = coronary artery bypass grafting; PCI = percutaneous coronary intervention; amp. = amputation; Revasc. = revascularization; Hosp. = hospitalization; CHF = congestive heart failure; ESRD = end-stage renal disease. Event rates were applied as observed in the Steno-2 study for years one to eight of the analysis, after which mean event rates were carried forward for subsequent years of simulation (and adjusted for age, see Appendix 3).

**Appendix 2** Transition probabilities from Steno-2: conventional treatment arm

| **Year** | **1** | **2** | **3** | **4** | **5** | **6** | **7** | **8** | **9+** |
| --- | --- | --- | --- | --- | --- | --- | --- | --- | --- |
| Death | 0.00000 | 0.00000 | 0.02532 | 0.00000 | 0.05334 | 0.05696 | 0.04523 | 0.03175 | 0.02658 |
| MI | 0.01266 | 0.01266 | 0.02532 | 0.02597 | 0.04018 | 0.08761 | 0.03030 | 0.00000 | 0.02934 |
| CABG | 0.00000 | 0.00000 | 0.03797 | 0.00000 | 0.03983 | 0.02941 | 0.01515 | 0.00000 | 0.01530 |
| PCI | 0.00000 | 0.00000 | 0.00000 | 0.00000 | 0.01351 | 0.01408 | 0.00000 | 0.06351 | 0.01139 |
| Stroke (major) | 0.06297 | 0.01266 | 0.03797 | 0.00000 | 0.00000 | 0.02941 | 0.00000 | 0.03175 | 0.02185 |
| Stroke (minor) | 0.00000 | 0.00000 | 0.00000 | 0.00000 | 0.02703 | 0.00000 | 0.00000 | 0.04688 | 0.00924 |
| Toe amp. | 0.00000 | 0.00000 | 0.01266 | 0.02597 | 0.00000 | 0.00000 | 0.03030 | 0.07863 | 0.01845 |
| Major leg amp. | 0.00000 | 0.00000 | 0.01266 | 0.01299 | 0.00000 | 0.00000 | 0.00000 | 0.01563 | 0.00516 |
| Revasc. leg | 0.01266 | 0.01266 | 0.02532 | 0.01299 | 0.01351 | 0.01471 | 0.04478 | 0.01563 | 0.01903 |
| Revasc. carotid artery | 0.00000 | 0.00000 | 0.00000 | 0.00000 | 0.00000 | 0.01471 | 0.00000 | 0.00000 | 0.00184 |
| Hosp. for CHF | 0.00000 | 0.01899 | 0.03797 | 0.00000 | 0.01351 | 0.02879 | 0.12053 | 0.04738 | 0.03340 |
| Dialysis | 0.00000 | 0.00000 | 0.00000 | 0.00000 | 0.01351 | 0.00000 | 0.02985 | 0.00000 | 0.00542 |
| ESRD | 0.00000 | 0.00000 | 0.00000 | 0.00000 | 0.00000 | 0.00000 | 0.01493 | 0.00000 | 0.00187 |

MI = myocardial infarction; CABG = coronary artery bypass grafting; PCI = percutaneous coronary intervention; amp. = amputation; Revasc. = revascularization; Hosp. = hospitalization; CHF = congestive heart failure; ESRD = end-stage renal disease. Event rates were applied as observed in the Steno-2 study for years one to eight of the analysis, after which mean event rates were carried forward for subsequent years of simulation (and adjusted for age, see Appendix 3).

**Appendix 3** Age-dependent risk adjustments

| **Event** | **Age-dependent adjustment factor** | **Reference** |
| --- | --- | --- |
| CHF | 1.044 | (12) |
| CVD event | 1.059 | Assumed same as for first MI (UKPDS 56) (13) |
| Revascularization of leg | 1.036 | Assumed same as for intermittent claudication (15) |
| Stroke | 1.092 | (UKPDS 60) (14) |
| Mortality | 1.08 | (11) |

CHF = congestive heart failure; CVD event = cardiovascular event (myocardial infarction, percutaneous coronary intervention, coronary artery bypass grafting)

**Appendix 4** Calculated disutility adjustments

|  | **Published State Disutility** | **Reference** |
| --- | --- | --- |
| **Uncomplicated type 2 diabetes** | 0.814 | (16) |
|  |  |  |
| **Complications** |  |  |
| ESRD | -0.324 | (26) |
| CHF (hospitalization) | -0.181 | (16) |
| Myocardial infarction | -0.078 | (16) |
| Stroke (major and minor) | -0.115 | (27) |
|  |  |  |
| **Interventions** |  |  |
| Dialysis (acute)* | 0 | (26) |
| Revascularization of carotid artery† | 0 | (28) |
| PCI | 0 | (28) |
| CABG | 0 | (28) |
| Revascularization of leg† | 0 | (28) |
| Amputation (major) | -0.272 | (27) |
| Amputation (toe) | -0.204 | (29) |

ESRD = end-stage renal disease; CHF = congestive heart failure; PCI = percutaneous coronary intervention; CABG = coronary artery bypass grafting; * = assumed only event disutility required as likely to be short-term; † = assumed to be same as PCI
